# Supplementary material for: Ultrathin quasi-hexagonal gold nanostructures for sensing arsenic in tap water
Source: Royal Society of Chemistry journal article supplement (doi:10.1039/d0ra02750b), 2020-01-01
Supplement: d0ra02750b1.pdf [file d0ra02750b1.pdf]

## Supporting Information

### Ultrathin Quasi-hexagonal Gold Nanostructures for Sensing Arsenic in Tap Water

Anu Prathap M. Udayan<sup>‡</sup>

Batul Kachwala<sup>‡</sup>

K. G. Karthikeyan

Sundaram Gunasekaran\*

Department of Biological Systems Engineering  
University of Wisconsin–Madison, WI 53706, USA

\* Corresponding author (Email address: [guna@wisc.edu](mailto:guna@wisc.edu))

<sup>‡</sup>These authors contributed equally

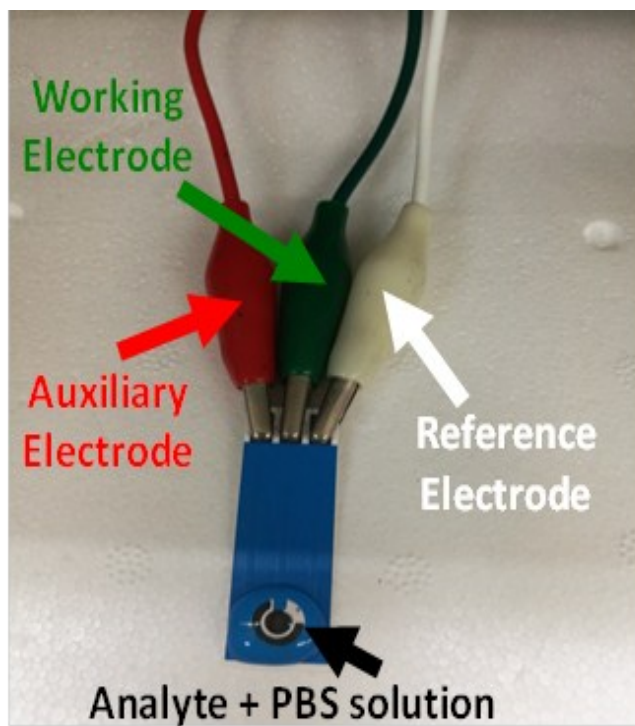

**Scheme S1.** Photograph of the entire experimental set up.

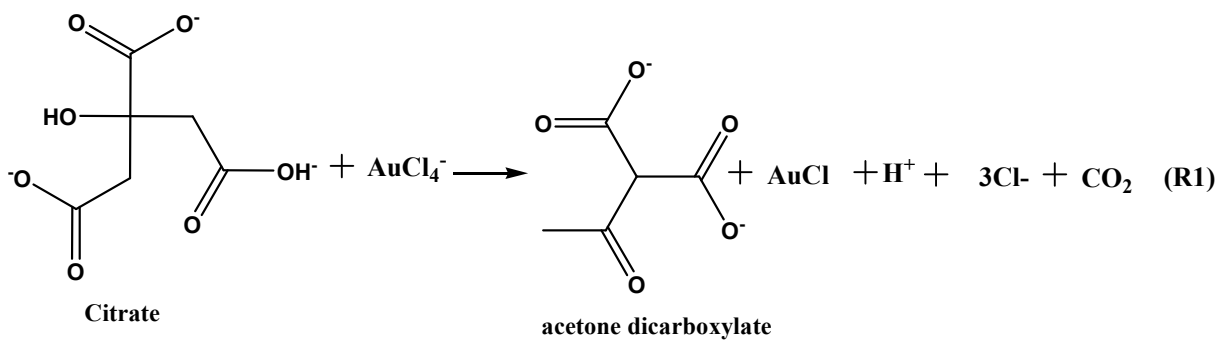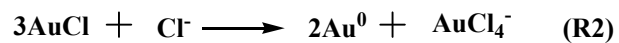

**Scheme S2.** The accepted mechanism for Turkevich method.

**Calculation of limit of detection (LOD) and limit of quantification (LOQ):**

$$\text{LOD} = 3.3 \cdot s_b / m \quad \text{and} \quad \text{LOQ} = 10 \cdot s_b / m$$

Where,  $s_b$  is the standard deviation of the blank sample measurement and  $m$  is the slope of the linear calibration plot of analyte measurement<sup>1</sup>.

**Calculation of slope m:**

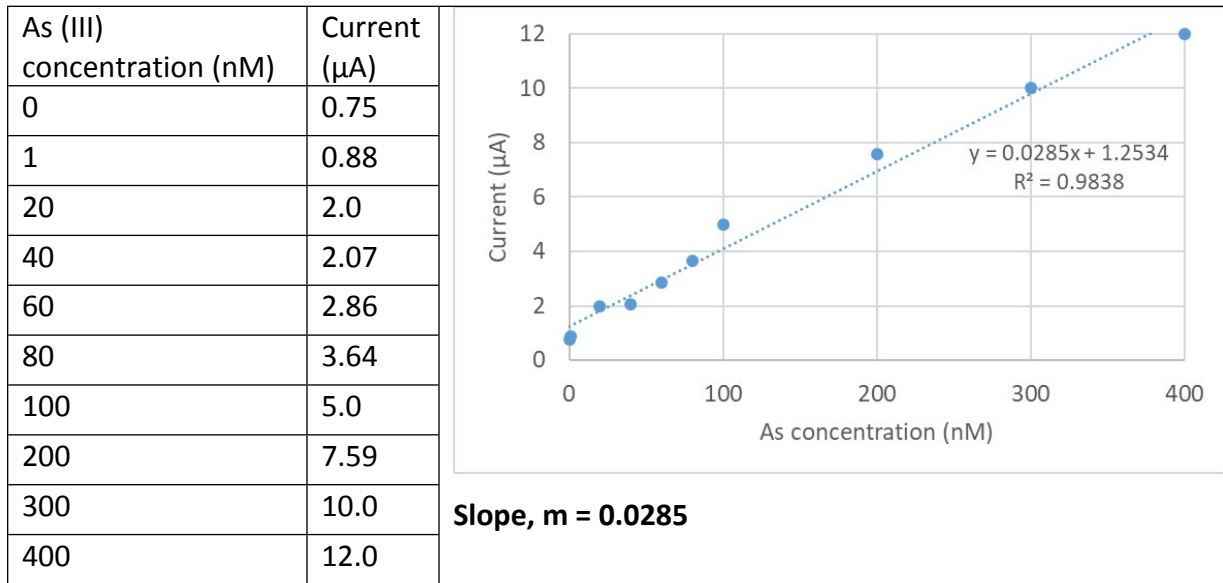

**Calculation of standard deviation of blank  $S_b$ :**

Standard deviation (SD) formula: 
$$s = \sqrt{\frac{\sum_{i=1}^n (x_i - \bar{x})^2}{n - 1}}$$

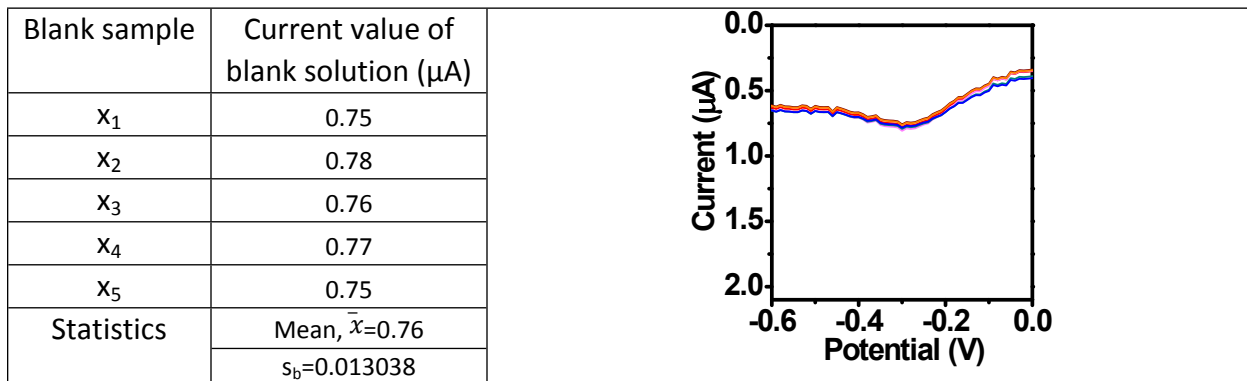

$$\text{LOD} = 3.3 \cdot s_b / m = (3.3 \cdot 0.013038) / 0.0285 = 0.0391 / 0.0285 = \mathbf{1.51 \text{ nM}}$$

$$\text{LOQ} = (10 \cdot 0.013038) / 0.0285 = 0.13038 / 0.0285 = \mathbf{4.57 \text{ nM}}$$

**Table. S1.** Comparison of published electrochemical As(III) sensors with that in the present work

| Electrode material                    | Voltammetry                                     | Tested sample           | Electrolyte used                      | LOD (nM) | LOQ (nM) | Interferents | Reference         |
|---------------------------------------|-------------------------------------------------|-------------------------|---------------------------------------|----------|----------|--------------|-------------------|
| Au plated carbon paste                | Constant current Stripping Analysis             | Contaminated freshwater | 0.25 M HCl + 1.25 M HClO <sub>4</sub> | 40       | -        | Cu           | <sup>2</sup>      |
| HMDE                                  | SWCSV                                           | Spiked freshwaters      | 1 M HCl + 45 ppm Cu(II)               | 0.8      | 2.7      | Cu, Sb       | <sup>3</sup>      |
| Au graphite                           | ASV                                             | -                       | EDTA-H <sub>3</sub> PO <sub>4</sub>   | -        | 174      | 30XCu        | <sup>4</sup>      |
| Au coated BDD thin-film               | DPASV                                           | Contaminated freshwater | Cation exchange resin / 1 M HCl       | 0.067    | 0.13     | Cu           | <sup>5</sup>      |
| Au film                               | Derivative anodic stripping chronopotentiometry | Wine sample             | 3 M HCl                               | 1        | 3.4      | 10X Cu       | <sup>6</sup>      |
| AuNP on GCE                           | LSV                                             | -                       | 1 M HCl + 2 μM Cu(II)                 | 0.08     | -        | Cu           | <sup>7</sup>      |
| Silver                                | SWASV                                           | -                       | 0.1 M HNO <sub>3</sub>                | 14       | -        | -            | <sup>8</sup>      |
| Au coated BDD thin-film               | DPASV                                           | Contaminated freshwater | Cation exchange resin / 1 M HCl       | 0.067    | 0.13     | Cu           | <sup>9</sup>      |
| AuNP/PANI-modified GCE                | SWASV                                           | -                       | 1 M HCl                               | 5.4      | -        | -            | <sup>10</sup>     |
| Pt nanotubes arrays on GCE            | LSV                                             | Contaminated freshwater | 0.1 M H <sub>2</sub> SO <sub>4</sub>  | 1.3      | 13.4     | Cl           | <sup>11</sup>     |
| AuPd NP on GCE                        | SWASV                                           | -                       | 0.1 M acetate buffer                  | 0.33     | 13.4     | Cu           | <sup>12</sup>     |
| AuNP on carbon polyethylene composite | LSV                                             | Spiked drinking water   | 0.1 M Na <sub>2</sub> SO <sub>3</sub> | 1.2      | -        | Cu           | <sup>13</sup>     |
| AuNPs/SPE                             | DPASV                                           | Spiked drinking water   | PBS                                   | 1.51 nM  | 4.57     | None         | <b>This study</b> |

## References

- 1 ICH, *ICH Topic Q 2 (R1) Validation of Analytical Procedures: Text and Methodology*, European Medicines Agency, 1995.
- 2 I. Svancara, K. Vytras, A. Bobrowski and K. Kalcher, *Talanta*, 2002, **58**, 45–55.
- 3 M. A. Ferreira and A. A. Barros, *Analytica Chimica Acta*, 2002, **459**, 151–159.
- 4 A. I. Kamenev, A. B. Lyakhov and S. E. Orlov, *J Anal Chem*, 2005, **60**, 156–162.
- 5 Y. Song and G. M. Swain, *Anal. Chim. Acta*, 2007, **593**, 7–12.
- 6 G. Dugo, L. La Pera, V. Lo Turco and G. Di Bella, *Chemosphere*, 2005, **61**, 1093–1101.
- 7 X. Dai and R. G. Compton, *Electroanalysis*, 2005, **17**, 1325–1330.
- 8 A. O. Simm, C. E. Banks and R. G. Compton, *Electroanalysis*, 2005, **17**, 1727–1733.
- 9 Y. Song and G. M. Swain, *Anal. Chim. Acta*, 2007, **593**, 7–12.
- 10 X. Dai, G. G. Wildgoose, C. Salter, A. Crossley and R. G. Compton, *Anal. Chem.*, 2006, **78**, 6102–6108.
- 11 H. Xu, L. Zeng, S. Xing, G. Shi, J. Chen, Y. Xian and L. Jin, *Electrochemistry Communications*, 2008, **10**, 1893–1896.
- 12 Y. Lan, H. Luo, X. Ren, Y. Wang and Y. Liu, *Microchim Acta*, 2012, **178**, 153–161.
- 13 E. A. Zakharova, G. N. Noskova, S. G. Antonova and A. S. Kabakaev, *International Journal of Environmental Analytical Chemistry*, 2014, **94**, 1478–1498.
